# Supplementary material for: Immunoinformatic Analysis of SARS-CoV-2 Nucleocapsid Protein and Identification of COVID-19 Vaccine Targets
Source: PubMed Central journal article supplement (PMC7655779; doi:10.3389/fimmu.2020.587615), 2020-10-28
Supplement: DataSheet_2.pdf [file DataSheet_2.pdf]

Supplementary Table 1. Comparison of conserved T cell exposed motifs across the human coronaviruses

| Sars-COV-2 Position                                | T cell exposed motif | peptide   | 229E | NL63 | HKU1 | OC43 | MERS | SARS-COV1 | SARS-COV2 | Pocket positions |
|----------------------------------------------------|----------------------|-----------|------|------|------|------|------|-----------|-----------|------------------|
| <b>MHC I – T cell exposed motifs ~~~4,5,6,7,8~</b> |                      |           |      |      |      |      |      |           |           |                  |
| 67                                                 | ~~~QGVPI~            | SDGQGVPIA |      |      | +    |      |      |           |           | SDG~~~~~A        |
|                                                    |                      | VEGQGVPIA |      |      |      | +    |      |           |           | VEG~~~~~A        |
|                                                    |                      | PRGQGVPIN |      |      |      |      |      | +         | +         | PRG~~~~~N        |
| 106                                                | ~~~YFYLL~            | PRWYFYLLG |      |      | +    | +    |      | +         | +         | PRW~~~~~G        |
| 107                                                | ~~~FYLLG~            | KLHFYLLGT | +    | +    |      |      |      |           |           | KLH~~~~~T        |
|                                                    |                      | RWYFYLLGT |      |      | +    | +    |      | +         | +         | RWY~~~~~T        |
| 108                                                | ~~~YYLGT~            | LHFYLLGTG | +    |      |      |      |      |           |           | LHF~~~~~G        |
|                                                    |                      | VHFYLLGTG |      | +    |      |      |      |           |           | VHF~~~~~G        |
|                                                    |                      | WYFYLLGTG |      |      | +    | +    |      | +         | +         | WYF~~~~~G        |
| 109                                                | ~~~YLGTG~            | HFYLLGTGP | +    | +    |      |      |      |           |           | HFY~~~~~P        |
|                                                    |                      | YFYLLGTGP |      |      | +    | +    |      | +         | +         | YFY~~~~~P        |
| 110                                                | ~~~LGTGP~            | FYLLGTGPH | +    | +    |      | +    |      |           |           | FYY~~~~~H        |
|                                                    |                      | FYLLGTGPY |      |      | +    |      |      |           |           | FYY~~~~~Y        |
|                                                    |                      | FYLLGTGPE |      |      |      |      |      | +         | +         | FYY~~~~~E        |

|                                                    |           |                 |   |   |   |   |   |   |   |                 |
|----------------------------------------------------|-----------|-----------------|---|---|---|---|---|---|---|-----------------|
| 254                                                | ~~~KPRQK~ | ILTKPRQKR       |   |   | + |   |   |   |   | ILT~~~~R        |
|                                                    |           | ILNKPRQKR       |   |   |   | + |   |   |   | ILN~~~~R        |
|                                                    |           | ASKKPRQKR       |   |   |   |   |   | + | + | ASK~~~~R        |
| 255                                                | ~~~PRQKR~ | LTKPRQKRT       |   |   | + |   |   |   |   | LTK~~~~T        |
|                                                    |           | LNKPRQKRS       |   |   |   | + |   |   |   | LNK~~~~S        |
|                                                    |           | SKKPRQKRT       |   |   |   |   |   | + | + | SKK~~~~T        |
| <b>MHC II – T cell exposed motifs ~2,3~ 5~7,8~</b> |           |                 |   |   |   |   |   |   |   |                 |
| 102                                                | PR~Y~YY   | KQLLPRWYFYLLGTG |   |   | + |   |   |   |   | KQLL~~W~F~~LGTG |
|                                                    |           | RQLLPRWYFYLLGTG |   |   |   | + |   |   |   | RQLL~~W~F~~LGTG |
|                                                    |           | KQLAPRWYFYLTGTG |   |   |   |   | + |   |   | KQLA~~W~F~~TGTG |
|                                                    |           | KELSPRWYFYLLGTG |   |   |   |   |   | + |   | KELS~~W~F~~LGTG |
|                                                    |           | KDLSPRWYFYLLGTG |   |   |   |   |   |   | + | KDLS~~W~F~~LGTG |
| 105                                                | YF~Y~GT   | LPRWYFYLLGTGPYA |   |   | + |   |   |   |   | LPRW~~Y~L~~GPYA |
|                                                    |           | LPRWYFYLLGTGPHA |   |   |   | + |   |   |   | LPRW~~Y~L~~GPHA |
|                                                    |           | APRWYFYLTGTGPEA |   |   |   |   | + |   |   | APRW~~Y~T~~GPEA |
|                                                    |           | SPRWYFYLLGTGPEA |   |   |   |   |   | + | + | SPRW~~Y~L~~GPEA |
| 106                                                | FY~L~TG   | PKLHFYLLGTGPHKD | + |   |   |   |   |   |   | PKLH~~Y~G~~PHKD |
|                                                    |           | PKVHFYLLGTGPHKD |   | + |   |   |   |   |   | PKVH~~Y~G~~PHKD |
|                                                    |           | PRWYFYLLGTGPYAN |   |   | + |   |   |   |   | PRWY~~Y~G~~PYAN |
|                                                    |           | PRWYFYLLGTGPHAK |   |   |   | + |   |   |   | PRWY~~Y~G~~PHAK |

|                                                      |           |                  |   |   |   |   |   |   |   |                 |
|------------------------------------------------------|-----------|------------------|---|---|---|---|---|---|---|-----------------|
|                                                      |           | PRWYFYLLGTGPEAG  |   |   |   |   |   | + |   | PRWY~~Y~G~~PEAG |
|                                                      |           | PRWYFYLLGTGPEAS  |   |   |   |   |   |   | + | PRWY~~Y~G~~PEAS |
| 107                                                  | YY~G~GP   | KLHFYLLGTGPHKDA  | + |   |   |   |   |   |   | KLHF~~L~T~~HKDA |
|                                                      |           | KVHFYLLGTGPHKDL  |   | + |   |   |   |   |   | KVHF~~L~T~~HKDL |
|                                                      |           | RWYFYLLGTGPYANA  |   |   | + |   |   |   |   | RWYF~~L~T~~YANA |
|                                                      |           | RWYFYLLGTGPHAKD  |   |   |   | + |   |   |   | RWYF~~L~T~~HAKD |
|                                                      |           | RWYFYLLGTGPEAAL  |   |   |   |   | + |   |   | RWYF~~T~T~~EAAL |
|                                                      |           | RWYFYLLGTGPEAGL  |   |   |   |   |   | + |   | RWYF~~L~T~~EAGL |
|                                                      |           | RWYFYLLGTGPEASL  |   |   |   |   |   |   | + | RWYF~~L~T~~EASL |
| <b>MHC II – T cell exposed motifs -1~~,3~ 5~7,8~</b> |           |                  |   |   |   |   |   |   |   |                 |
| 64                                                   | F~~G~G~PI | FKFSDGQGVPIAFGV  |   |   | + |   |   |   |   | FK~SD~Q~V~AFGV  |
|                                                      |           | FEFVEGQGVPIAPGV  |   |   |   |   |   |   |   | FE~VE~Q~V~APGV  |
|                                                      |           | LRFPRGQGVPIINTNS |   |   |   |   |   |   |   | LR~PR~Q~V~NTNS  |
|                                                      |           | LKFPRGQGVPIINTNS |   |   |   |   |   |   |   | LK~PR~Q~V~NTNS  |
| 104                                                  | P~~Y~Y~LG | LLPRWYFYLLGTGPY  |   |   | + |   |   |   |   | LL~RW~F~Y~TGPY  |
|                                                      |           | LLPRWYFYLLGTGPH  |   |   |   |   |   |   |   | LL~RW~F~Y~TGPH  |
|                                                      |           | LSPRWYFYLLGTGPE  |   |   |   |   |   |   |   | LS~RW~F~Y~TGPE  |
| 106                                                  | W~~Y~L~TG | PRWYFYLLGTGPYAN  |   |   | + |   |   |   |   | PR~YF~Y~G~~PYAN |
|                                                      |           | PRWYFYLLGTGPHAK  |   |   |   |   |   |   |   | PR~YF~Y~G~~PHAK |
|                                                      |           | PRWYFYLLGTGPEAS  |   |   |   |   |   |   |   | PR~YF~Y~G~~PEAS |
